# Supplementary material
Source: MDPI journal article supplement (https://www.mdpi.com/2073-4433/15/5/544)
Supplement: s1 [file s1]

Supplementary material

**Table S1.** Chemical substances contained in the composition

| Composition       | Chemical substances                                                                                   |
|-------------------|-------------------------------------------------------------------------------------------------------|
| Crustal materials | Al, Si, Ca, Fe, Ti                                                                                    |
| Trace elements    | Li, Be, V, Cr, Mn, Co, Ni, Cu, Zn, As, Se, Sr, Mo, Ag, Cd, Sn, Sb, Ba, Tl, Pb, Bi, Th, U              |
| Organic matters   | OM                                                                                                    |
| Inorganic carbons | EC                                                                                                    |
| Anion             | F <sup>-</sup> , Cl <sup>-</sup> , NO <sub>3</sub> <sup>-</sup> , SO <sub>4</sub> <sup>2-</sup>       |
| Cation            | Na <sup>+</sup> , K <sup>+</sup> , Mg <sup>2+</sup> , Ca <sup>2+</sup> , NH <sub>4</sub> <sup>+</sup> |
| Unknown           | Dustfall amount subtract the sum of known components                                                  |
